# Supplementary material
Source: Research Square preprint supplement (doi:10.21203/rs.3.rs-8953703/v1)
Supplement: Supplementary file 1 [file 5b69ff290db3cfe1bca85f8b.docx]

**Supplementary Information**

**Stem cell mitochondrial transfer rejuvenates CAR-NKT cell metabolism and antitumor activity**

Yan-Ruide Li1,2,*, Bo Zhang2,*, Shubing Wang2,*, Yichen Zhu1,2,*, Xinyuan Shen1,2, Zhengyao Shao3, Yuning Chen1,2, Jie Huang1,2, Haochen Nan2, Youcheng Yang2, Shreya Gumate4,5, Vatche G. Agopian4,5, Lili Yang1,2,6,7,8,9,10,§, Song Li2,§

**Author Affiliation:**

1Department of Microbiology, Immunology & Molecular Genetics, University of California, Los Angeles, Los Angeles, CA 90095, USA

2Department of Bioengineering, University of California, Los Angeles, Los Angeles, CA 90095, USA

3Department of Pharmacology, University of California, San Diego, La Jolla, CA 90023, USA

4Department of Surgery, David Geffen School of Medicine, University of California, Los Angeles, Los Angeles, CA 90095, USA

5Dumont-UCLA Liver Cancer Center, University of California, Los Angeles, Los Angeles, CA 90095, USA

6Jonsson Comprehensive Cancer Center, David Geffen School of Medicine, University of California, Los Angeles, Los Angeles, CA 90095, USA

7Eli and Edythe Broad Center of Regenerative Medicine and Stem Cell Research, University of California, Los Angeles, Los Angeles, CA 90095, USA

8Molecular Biology Institute, University of California, Los Angeles, CA 90095, USA

9Parker Institute for Cancer Immunotherapy, University of California, Los Angeles, Los Angeles, CA 90095, USA

10Goodman-Luskin Microbiome Center, University of California, Los Angeles, Los Angeles, CA 90095, USA

*These authors contributed equally.

§Corresponding author. Email: [charlie.li@ucla.edu](mailto:charlie.li@ucla.edu) (Y.-R.L.), [liliyangucla01@gmail.com](mailto:liliyangucla01@gmail.com) (L.Y.) and [songli@ucla.edu](mailto:songli@ucla.edu) (S.L.)

**

**

**Supplementary Fig. 1 . iPSC-derived mitochondrial transfer (iPSC-MT) in CAR-NKT cells.**

**a** Immunofluorescence (IF) imaging showing iPSC-derived mitochondria in CAR-NKTMito cells at 2 and 3 days post-transfer. iPSCs were transduced with BacMam 2.0 Mitochondria-GFP to label mitochondria with GFP.

**b** Quantification of MT efficiency into CAR-NKT cells at 2 and 3 days post-transfer, as measured by IF (n = 24).

**c** Seahorse extracellular flux analysis showing oxygen consumption rate (OCR, left) and extracellular acidification rate (ECAR, right) in CAR-NKT and CAR-NKTMito cells (n = 3).

Representative of 3 experiments. Data are presented as the mean ± SEM. ns, not significant, *p < 0.05, **p < 0.01, ***p < 0.001, by Student’s *t* test.





**Supplementary Fig. 2 Transcriptomic profiling of CAR-NKT and CAR-NKTMito cells.**

**a** Violin plots showing the expression of NKT TCR (TCRα V10) and key transcription factor (promyelocytic leukemia zinc finger protein; PLZF) genes in CAR-NKT and CAR-NKTMito cell samples, indicating robust maintenance of NKT cell identity.

**b** Gene Set Enrichment Analysis (GSEA) plots showing the enrichment of gene signatures in the indicated four cell clusters.

**c** Violin plots showing the expression distribution of terminally differentiated effector memory, and NK gene signatures in CAR-NKT and CAR-NKTMito cell samples.

**d** Violin plots showing the expression of the indicated genes associated with TNF/inflammatory signaling, antigen preenattion, as well as growth factor and differentiation signaling, in CAR-NKT and CAR-NKTMito cell samples.

P values shown in the violin plots were calculated using a two-tailed Wilcoxon rank-sum test.

**

**

**Supplementary Fig. 3 Generation of healthy donor PBMC-derived iPSC-MT-enhanced conventional CAR-T cells**

**a** Schematic illustrating MT from iPSCs to human CAR-T cells derived from healthy donors.

**b** FACS plots showing CD19-targeting CAR-T cell purity and successful transfer of iPSC-derived mitochondria into CAR-T cells at 2 and 3 days post-transfer. The mitochondrial-to–T cell (Mito:T) ratio was 4:1, and iPSC-derived mitochondria were labeled with MitoTracker Green (MTG).

**c** Quantification of MT efficiency into CAR-T cells at different Mito:T ratios, as measured by flow cytometry (n = 5; n indicates different healthy donors).

Representative of 3 experiments. Data are presented as the mean ± SEM.





**Supplementary Fig. 4 *In vivo* phenotype and functionality of CAR-NKT and CAR-NKTMito cells.**

**a** FACS analyses of T cell effector markers (CD25 and PD-1) and cytotoxic molecules (Granzyme B) in the indicated therapeutic cells isolated from mouse liver (n = 5). Data are related to main Fig. 7**g**-**j**.

**b** FACS analyses of T cell effector markers (CD25 and PD-1) and cytotoxic molecules (Granzyme B) in the indicated therapeutic cells isolated from mouse peritoneal fluid (n = 5). Data are related to main Fig. 7**k**-**n**.

Representative of 3 experiments. Data are presented as the mean ± SEM. ns, not significant, *p < 0.05, **p < 0.01, ***p < 0.001, ****p < 0.0001, by Student’s *t* test.

**Supplementary Table 1. Clinical HCC patient sample information**

| **Patient ID** | **Diagnosis** | **Treatment**  **status** | **Specimen type** |
| --- | --- | --- | --- |
| #1 | Primary liver HCC | Tx naive | Tumor samples and  peripheral blood samples |
| #2 | Primary liver HCC | Tx naive |
| #3 | Primary liver HCC, MASH | Tx naive |
| #4 | Primary liver HCC | Tx naive | Peripheral blood samples |
| #5 | Primary liver HCC, MASH, cirrhosis | Tx naive |
| #6 | Primary liver HCC, HCV cirrhosis | Tx naive |
| #7 | Primary liver HCC, MASH | Tx naive |
| #8 | Primary liver HCC, MASH cirrhosis | Tx naive |
| #9 | Primary liver HCC | Treated |
| #10 | Primary liver HCC | Treated |

**Abbreviations**: HCC, hepatocellular carcinoma; MASH, metabolic dysfunction–associated steatohepatitis; HCV, hepatitis C virus; Tx naive, treatment naïve.
